# Supplementary material
Source: publisher site journal article supplement (https://www.dovepress.com/article/503930)
Supplement: Supplementary file 1 [file get_supplementary_file.php]

**
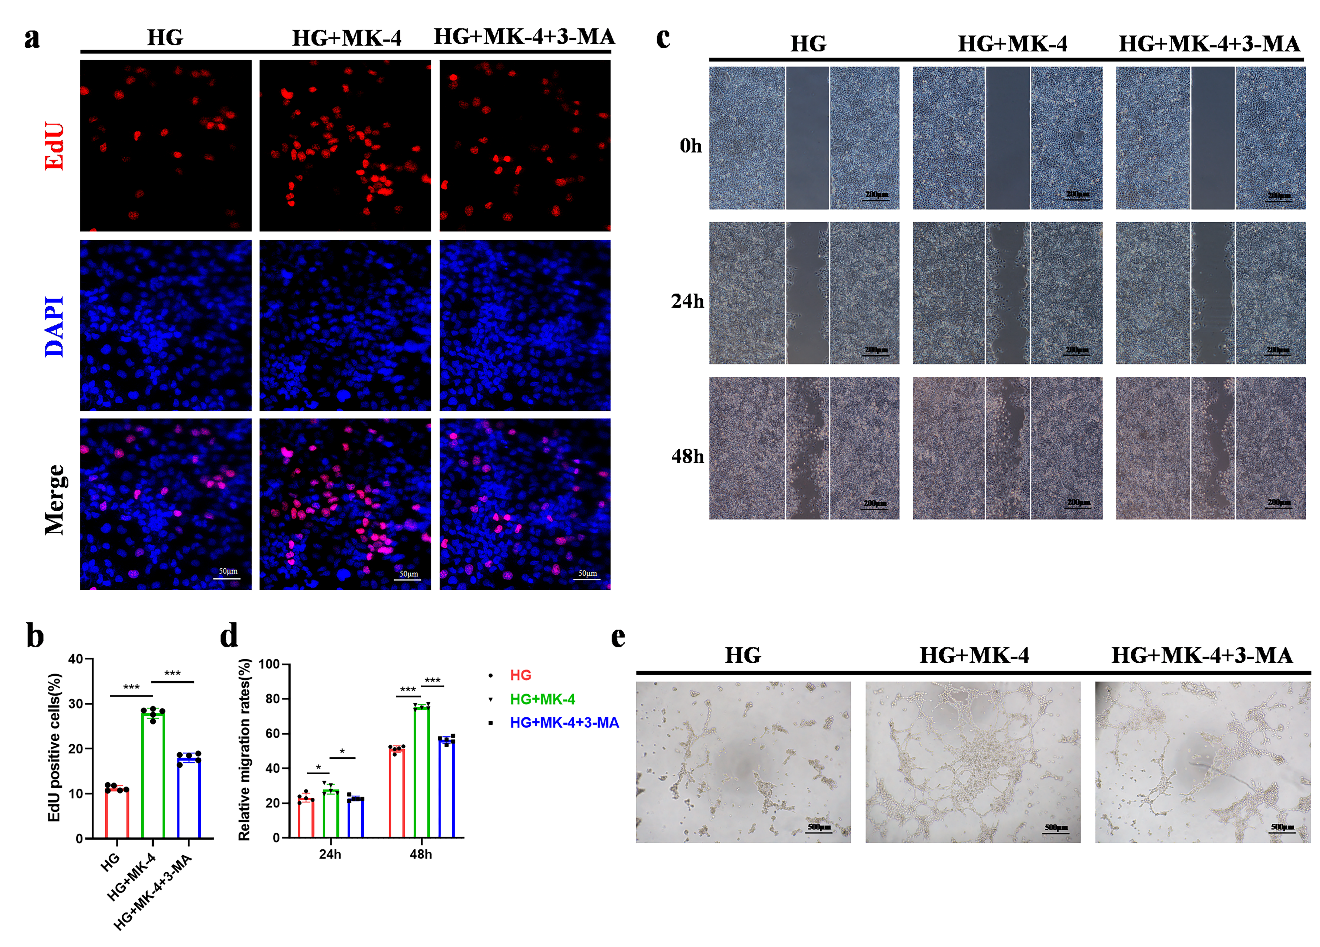
**

**Appendix Figure 1** (a, b) Representative images of EdU staining in ECs under different treatments. Scale bars: 50 μm. (c, d) Representative images of the migration area of ECs in different treatments. Scale bar: 200 μm. (e) Representative images of tube formation in ECs stimulated with different treatments. Scale bar: 500 μm. Data given as the mean±SD were representative of five independent experiments with similar results. **P* < 0.05. ****P* < 0.001.
